# Supplementary material for: Ultra-high precision silicon isotope micro-analysis using a Cameca IMS-1280 SIMS instrument by eliminating the topography effect
Source: Royal Society of Chemistry journal article supplement (doi:10.1039/c8ja00431e), 2019-01-01

## Supplementary file

Topography conditions of typical sample grains in this study. The grains come from two mounts, (a) and (c) are come from mount B, (b) and (d) are come from mount C. The topography of each grain is documented with reflection light image, secondary electron image and 3D optical microscope image, respectively. The relief on each grain varies from ~2 to 5  $\mu\text{m}$ .

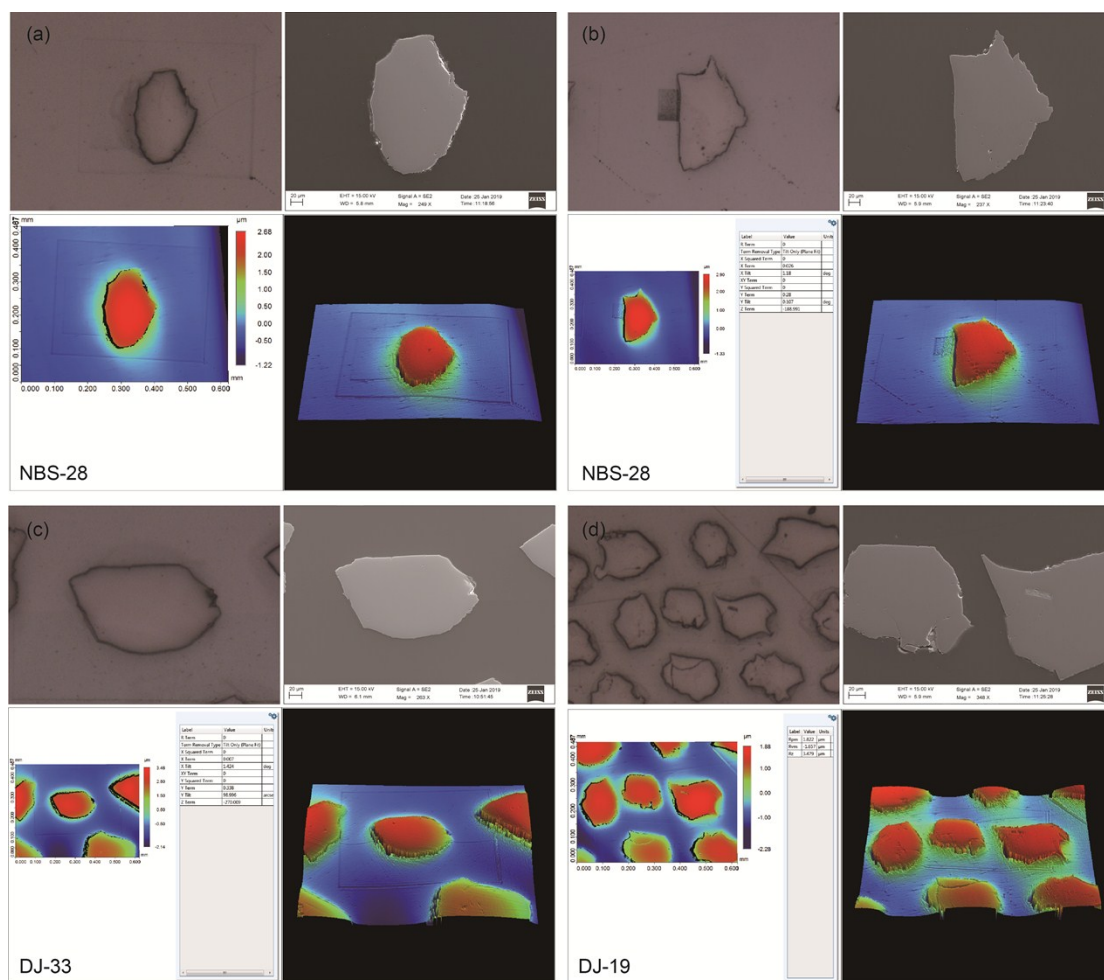

Supplement: c8ja00431e1.pdf [file c8ja00431e1.pdf]
